# Supplementary material for: Evaluation of 3-Deoxy-D-Arabino-Heptulosonate 7-Phosphate Synthase (DAHPS) as a Vulnerable Target in Mycobacterium tuberculosis
Source: PubMed Central journal article supplement (PMC9430761; doi:10.1128/spectrum.00728-22), 2022-07-14
Supplement: spectrum.00728-22-s0001.pdf [file spectrum.00728-22-s0001.pdf]

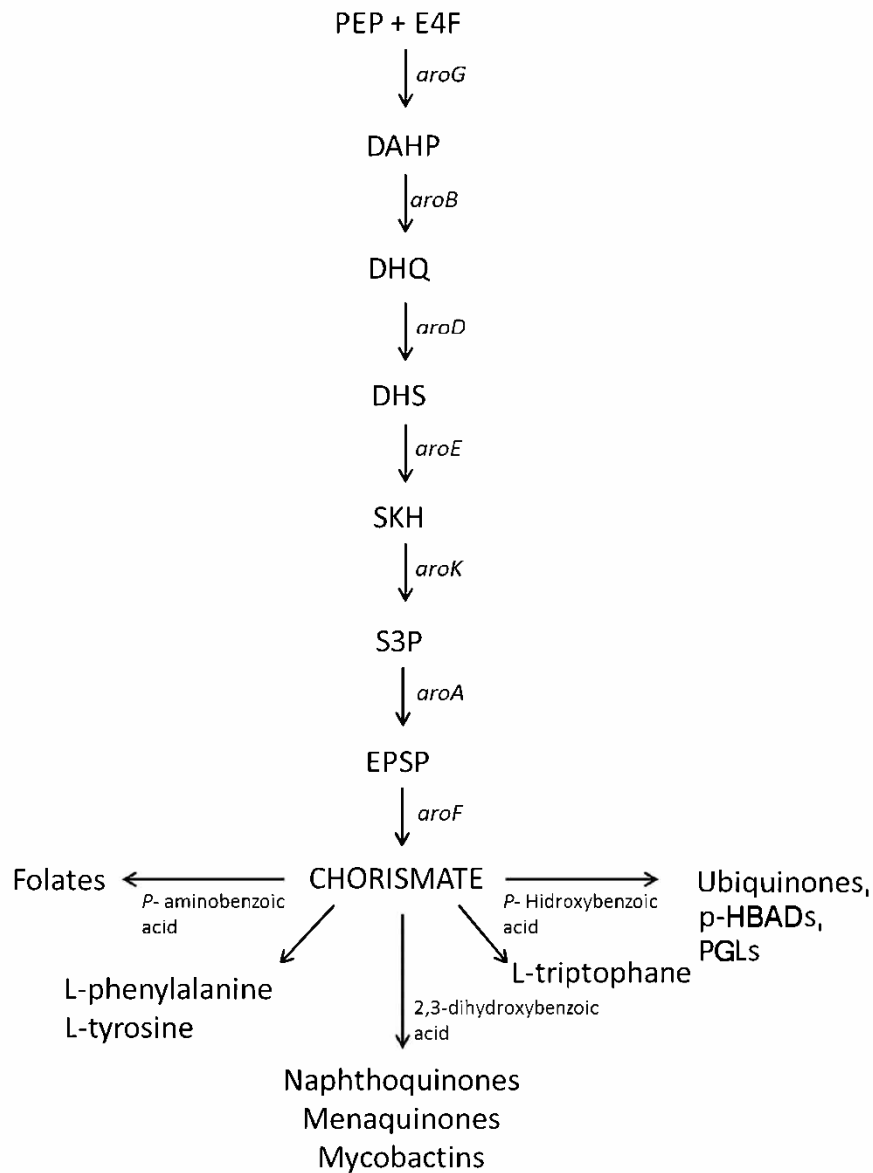

**Figure S1:** Schematic of the shikimate pathway and additional terminal pathways leading to the aromatic compounds. PEP: phosphoenolpyruvate; E4: D-erythrose 4-phosphate; *aroG*: gene encoding DAHP synthase; DAHP: 3-deoxy-d-arabino-heptulosonate-7-phosphate; *aroB*: gene encoding DHQ synthase; DHQ: 3-dehydroquininate; *aroD*: gene encoding DHQ dehydratase; DHS: 3-dehydroshikimate; *aroE*: gene encoding SKH dehydrogenase (SDH); SKH: shikimate; *aroK*: gene encoding SKH kinase; S3P: shikimate- 3-phosphate; *aroA*: gene encoding EPSP synthase; EPSP: 5-enolpyruvylshikimate-3-phosphate; *aroF*: gene encoding chorismate synthase.

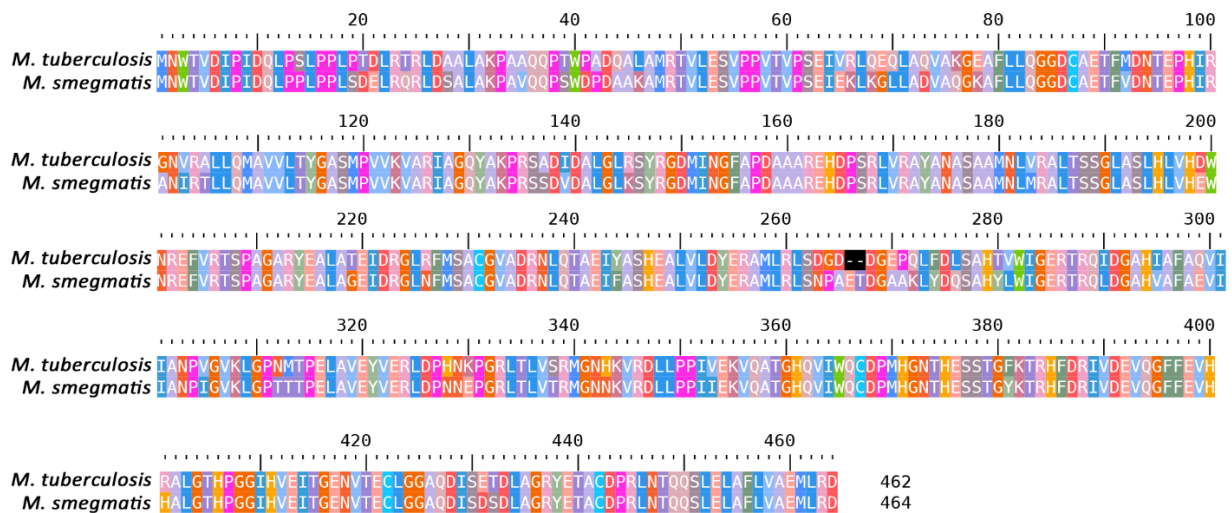

**Figure S2:** Pairwise alignment of *aroG* from *M. tuberculosis* and MSMEG\_4244 from *M. smegmatis*. Identity: 405/464 (87.3%). Similarity: 436/464 (94.0%). Gaps: 2/464 (0.4%). Alignment parameters: Matrix: EBLOSUM62; Gap penalty: 10.0; Extend penalty: 0.5.

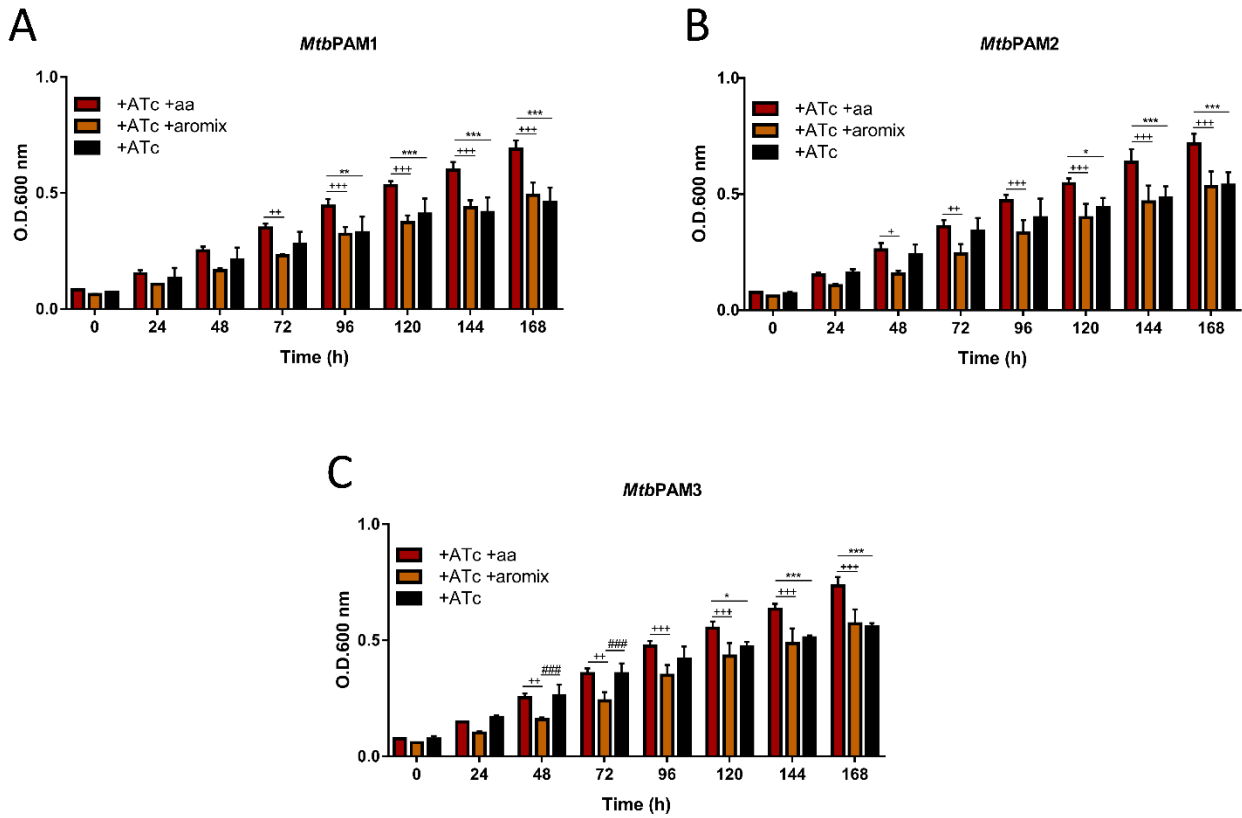

**Figure S3: Comparative effect of *aroG* silencing on *M. tuberculosis*.** Comparison of *aroG*-silencing cultures growth in presence of ATc 100ug/mL in medium supplemented with amino acids or aromix knockdown directed to PAM1 (A), PAM2 (B) or PAM3 (C). Mean  $\pm$  standard deviation from biological and technical duplicates. For \*=P value <0.03, \*\*=P value <0.002 and \*\*\*=P value <0.001.

**Table S1** - qQT-PCR primers and probes used in this study.

| Target                                   | Primer Forward               | Primer Reverse              | Probe                                             |
|------------------------------------------|------------------------------|-----------------------------|---------------------------------------------------|
| <b>Rv2178c</b>                           | 5'ctacagaccgccgaaatctatg 3'  | 5' gtgcggacaggtcaaaca 3'    | /56-FAM/catgttgag/<br>Zen/gtgtccgacggtga/3IABkFQ/ |
| <b>MSMEG_4244</b>                        | 5' ggtacaagaccaggcacttc 3'   | 5' cgagacattcggtgacgttt 3'  | /56-FAM/tcgacgagg/<br>Zen/tgcagggcttt/3IABkFQ/    |
| <b>SigA<br/>(<i>M. tuberculosis</i>)</b> | 5' catggtcgaggtgatcaacaa 3'  | 5' gggatgatgccatctctttgg 3' | /56-FAM/cattcaacg/<br>Zen/cgagctgctgca/3IABkFQ/   |
| <b>SigA<br/>(<i>M. smegmatis</i>)</b>    | 5' cgagaagttcgactacaccaag 3' | 5' ccatgtgcaccgggatac 3'    | /56-FAM/tggcgtagg/Zen/<br>tcgagaactttagc/3IABkFQ/ |
| <b>inhA</b>                              | 5' gcattcgattgggtcatgc 3'    | 5' atacgaatacggagatgtg 3'   | 56-FAM/atgggcatc/Zen/aaccgt<br>tcttca/3IABkFQ/    |
| <b>mmpL3</b>                             | 5' ctggtaacgctggtgatgaa 3'   | 5' ggcaggtattctcgctgatac 3' | /56-FAM/tggtggtga/Zen/tggtgct<br>gctgat/3IABkFQ/  |

**Table S2** – Essentiality and vulnerability of *aro* genes from *M. tuberculosis* and *M. smegmatis*.

| <i>M. tuberculosis</i> |           |                           |                 | <i>M. smegmatis</i> |              |                           |                 |
|------------------------|-----------|---------------------------|-----------------|---------------------|--------------|---------------------------|-----------------|
| gene                   | Rv number | Essentiality <sup>1</sup> | VI <sup>2</sup> | gene                | MSMEG number | Essentiality <sup>3</sup> | VI <sup>2</sup> |
| <i>aroG</i>            | Rv2178c   | essential                 | -13.36          | <i>aroG</i>         | MSMEG_4244   | uncertain                 | -0.2            |
| <i>aroB</i>            | Rv2538c   | essential                 | -9.2            | <i>aroB</i>         | MSMEG_3033   | uncertain                 | -4.93           |
| <i>aroD</i>            | Rv2537c   | essential                 | -5.92           | <i>aroQ</i>         | MSMEG_1922   | uncertain                 | -3.52           |
|                        |           |                           |                 | <i>aroQ</i>         | MSMEG_2532   | uncertain                 | 0.11            |
| <i>aroE</i>            | Rv2552c   | NonEssential              | -9.01           | <i>aroE</i>         | MSMEG_3028   | uncertain                 | -4.02           |
| <i>aroK</i>            | Rv2539c   | Essential                 | -10.16          | <i>aroK</i>         | MSMEG_0453   | uncertain                 | 0.24            |
|                        |           |                           |                 | <i>aroK</i>         | MSMEG_3031   | uncertain                 | -7.18           |
| <i>aroA</i>            | Rv3227    | Essential                 | -9.00           | <i>aroA</i>         | MSMEG_1890   | uncertain                 | -7.56           |
| <i>aroF/aroC</i>       | Rv2540c   | Essential                 | -11.38          | <i>aroC</i>         | MSMEG_3030   | uncertain                 | -9.05           |

<sup>1</sup>TnSeq essentiality predictions for *M. tuberculosis* taken from DeJesus et al. 2017 (PMID: 28096490).

<sup>2</sup>VI: Vulnerability Index. Vulnerability predictions taken from Bosch & DeJesus et al. Cell. 2021 (PMID: 34297925).

<sup>3</sup>TnSeq essentiality predictions for *M. smegmatis* taken from Dragset et al. 2019 (PMID: 31388080). Data obtained from <https://pebble.rockefeller.edu>.
